# Supplementary material
Source: MDPI journal article supplement (https://www.mdpi.com/2225-1154/5/4/86)
Supplement: s1 [file s1]

## Supplementary Information

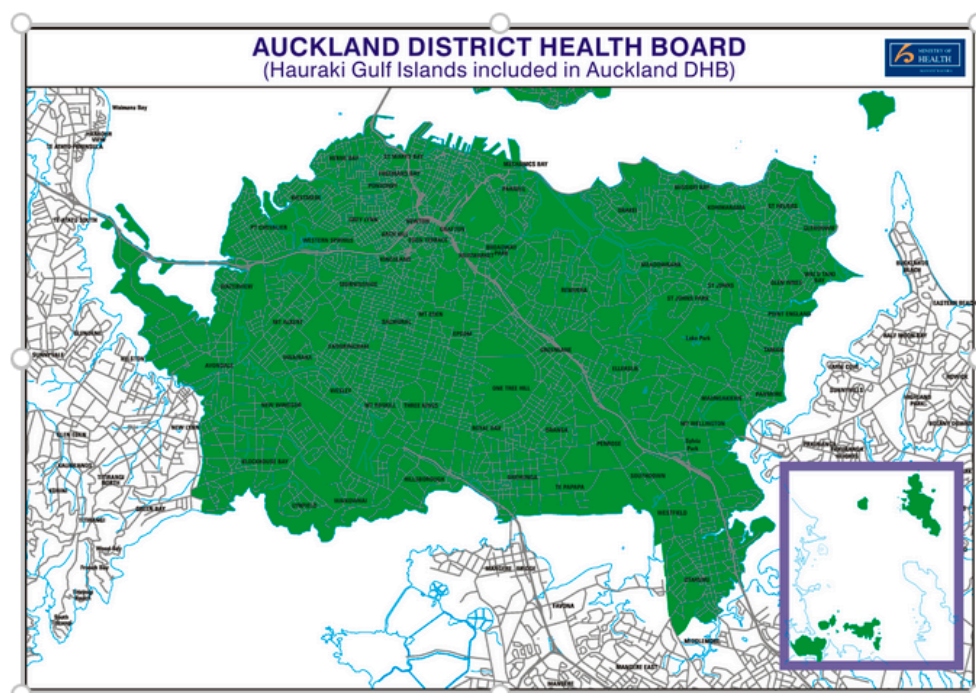

Figure SI.1. Districts of Auckland that are covered by Auckland district health board. (Insert) Hauraki Gulf islands and Great Barrier Island.
